# Supplementary material for: Brain metabolites in cholinergic and glutamatergic pathways are altered by pancreatic cancer cachexia
Source: PubMed Central journal article supplement — J Cachexia Sarcopenia Muscle. 2020 Oct 2;11(6):1487–500. doi: 10.1002/jcsm.12621 (PMC7749557; doi:10.1002/jcsm.12621), 2020-10-02
Supplement: JCSM-11-1487-s001.pdf [file JCSM-11-1487-s001.pdf]

## Supplemental Materials

### Brain Metabolites in Cholinergic and Glutamatergic Pathways are Altered by Pancreatic Cancer Cachexia

Paul T. Winnard Jr.<sup>1‡</sup>, Santosh Kumar Bharti<sup>1‡</sup>, Raj Kumar Sharma<sup>1</sup>, Balaji Krishnamachary<sup>1</sup>, Yelena Mironchik<sup>1</sup>, Marie-France Penet<sup>1,2</sup>, Michael Goggins<sup>4</sup>, Anirban Maitra<sup>2,4</sup>, Ihab Kamel<sup>1,2</sup>, Karen M. Horton<sup>1,2</sup>, Michael A. Jacobs<sup>1,2</sup>, Zaver M. Bhujwala<sup>\*1,2,3</sup>

<sup>1</sup>The Russell H. Morgan Department of Radiology and Radiological Science, <sup>2</sup>Sidney Kimmel Comprehensive Cancer Center, <sup>3</sup>Department of Radiation Oncology and Molecular Radiation Sciences, The Johns Hopkins University School of Medicine, Baltimore, MD, USA; <sup>4</sup>The University of Texas MD Anderson Cancer Center, TX, USA

**Running Title:** Cachexia brain metabolic signature

**Keywords:** human pancreatic cancer xenografts, human plasma, cachexia, brain and plasma <sup>1</sup>H MR spectroscopy, metabolites

‡: These investigators contributed equally to this work.

**\*Correspondence:**

Zaver M. Bhujwala

The Johns Hopkins University School of Medicine

The Russell H. Morgan Department of Radiology and Radiological Science

Division of Cancer Imaging Research

720 Rutland Avenue, Rm 208C Traylor Building

Baltimore, MD, USA 21205

Office Phone: 410-955-9698

FAX: 410-614-1948

E-mail: [zaver@mri.jhu.edu](mailto:zaver@mri.jhu.edu)

**Conflict of Interest:** The authors have no potential conflicts of interest to disclose.

## Supplemental Methods

**H&E staining of brain tissue.** Mouse brains were rapidly removed at sacrifice, bisected sagittally and each half was placed into formalin for a 24 – 36 h fixation at 4° C. Formalin fixed brains were rinsed with PBS and stored in 70% ETOH prior to delivery to a Johns Hopkins Core facility where the samples were embedded in paraformaldehyde, sectioned (5-7  $\mu\text{m}$ ) onto slides, and stained with H&E, using standard protocols.

**Protein extraction, protein concentration estimates, SDS-PAGE, and immunoblots.** Snap-frozen brain tissue samples (30 – 40 mg) were pulverized under liquid  $\text{N}_2$  and upon reaching  $\sim 4^\circ\text{C}$  lysed with 5 volumes of RIPA buffer solution supplemented with protease inhibitor cocktail (Sigma-Aldrich, St Louis, MO) along with 1 mM each of DTT, sodium orthovanadate, sodium fluoride, and phenylmethylsulfonyl fluoride. Cell lysis/protein extraction proceeded for 30 min on ice followed by sonication and centrifugation at 12,000 rpm for 30 mins at 4°C. Cleared supernatants were decanted into fresh tubes and stored at  $-80^\circ\text{C}$ .

Protein concentration estimates were determined using a Bradford protein assay kit (Pierce, Rockford, IL, USA) according the manufacturer's instructions.

**SDS-PAGE:** Proteins (60-100  $\mu\text{g}$ ) were resolved in 7% gels during electrophoresis at room temperature and constant voltage (100 V) for 3 h. Proteins were transferred to nitrocellulose membranes at 40-mA current at 4°C overnight.

**Immunoblots:** Antibodies used to determine the expression level of various protein in the samples from each cohort are listed in Supplemental Table 1. Immediately following the transfer, membranes were stained with Ponceau Red to check for quality of transfer and later washed in water followed by TBST for 5 min. The membrane was blocked in 5% skim milk-TBST for 1 hour and probed overnight at 4° C with the appropriate antibody diluted in 5% skim milk-TBST

(Supplemental Table 1). In all cases, glyceraldehyde 3-phosphate dehydrogenase (GAPDH) was used as an internal loading control and probed with monoclonal anti-GAPDH antibody (1:50,000 dilution, Sigma-Aldrich, St Louis, MO) in 5% skim milk-TBST for 2 h at room temperature. The membranes were then washed 3x 15 min in TBST and probed with appropriate (either anti-rabbit or anti-mouse IgG) horseradish peroxidase-labeled secondary antibodies (GE health care, Piscataway, NJ, USA) in 5% skim milk-TBST for 1 h at room temperature. Blots were developed using a SuperSignal West Pico kit (Pierce, Rockford, IL, USA) according to the manufacturer's protocol and visualized using X-Ray film.

### **Human <sup>1</sup>H MR spectroscopic imaging**

Clinical multivoxel MR spectroscopic imaging (MRSI) was performed using a Siemens Prisma 3T and a 20-channel head coil, a single 10 mm thick slice using a Stimulated Echo Acquisition Method (STEAM) centered in the midbrain, just above the corpus callosum in deep white matter. Prior to MRSI, shimming was performed to optimize field homogeneity, and water suppression was optimized using automated routines provided by the manufacturer. The scanning parameters were: TR/TM/TE 1700/10/20ms, 16×16 matrix size, slice thickness 10 mm, 16×16 cm field of view, total data acquisition time was approximately nine minutes, and nominal voxel size was 1.0 ml. The echo signal was digitized with 2048 data points and a spectral width of 1,200 Hz. Raw spectroscopy data were processed using MRSI software (syngo MR B17). The spectra were used to calculate relative metabolite concentrations. Anatomical T1 MPRAGE image (TE/TR = 2.9/2000 ms), T2-weighted (TE/TR = 96/7270ms) and FLAIR (TE/TR/IR=89/9000/2500ms) images were acquired for each subject.

**Supplemental Table 1.** Primary antibodies used at the given dilutions and the suppliers.

| <b>Antigen</b>                                                          | <b>Antibody Type</b> | <b>Dilution</b> | <b>Supplier</b> | <b>Catalogue #</b> |
|-------------------------------------------------------------------------|----------------------|-----------------|-----------------|--------------------|
| <b>Choline Kinase-<math>\alpha</math><br/>(Chk-<math>\alpha</math>)</b> | Rabbit Polyclonal    | 1:1000          | Abcam           | Ab88053            |
| <b>Choline Transporter-1<br/>(CHT1/SLC5A7)</b>                          | Rabbit Polyclonal    | 1:1000          | Abnova          | PAB5294            |
| <b>Choline Transporter-like-1<br/>(CTL1/SLC44A1)</b>                    | Rabbit Polyclonal    | 1:1000          | ABclonal        | A15413             |
| <b>Glutamine Synthetase<br/>(GLUL)</b>                                  | Rabbit Polyclonal    | 1:40,000        | Biorbyt         | P15104             |
| <b>Glutaminase 1<br/>(GLS1)</b>                                         | Rabbit Monoclonal    | 1:1000          | Invitrogen      | 6H5L15             |
| <b>Glutaminase 2<br/>(GLS2)</b>                                         | Rabbit Polyclonal    | 1:500           | GeneTex         | GTX133243          |
